# Supplementary material for: Male-biased aganglionic megacolon in the TashT mouse model of Hirschsprung disease involves upregulation of p53 protein activity and Ddx3y gene expression
Source: PubMed Central journal article supplement (PMC7500598; doi:10.1371/journal.pgen.1009008), 2020-09-08
Supplement: pgen.1009008.s011.pdf [file pgen.1009008.s011.pdf]

**S1 Table. List of all primers used in this study**

| <b>qPCR</b>                       |                                                            |
|-----------------------------------|------------------------------------------------------------|
| <b>Eif2s3y_Fwd</b>                | GAA TGG TTG GGC AGG TCC TT                                 |
| <b>Eif2s3y_Rev</b>                | GCC TCT TCT TAT CTG GCC CC                                 |
| <b>Ddx3y_Fwd</b>                  | GTT GAC TGG TGG GGC AAT TG                                 |
| <b>Ddx3y_Rev</b>                  | CCA GGA TAA GTT CAT TCA CCA TC                             |
| <b>Psm2_Fwd</b>                   | CCC AGA CTA TGT CCT CGT CG                                 |
| <b>Psm2_Rev</b>                   | CCG TGT GAA GTT AGC TGC TG                                 |
| <b>Ddx3x_Fwd</b>                  | AGT CGG TAT ATA AGG TCG GTG                                |
| <b>Ddx3x_Rev</b>                  | TGC TGT ACT TCC TCC ACT CTG                                |
| <b>Trp53_Fwd</b>                  | CCA TCA TCA CAC TGG AAG ACT CC                             |
| <b>Trp53_Rev</b>                  | TCC AGA CTC CTC TGT AGC ATG G                              |
| <b>IRES_Tg_Fwd</b>                | TTG AAT GTC GTG AAG GAA GCA G                              |
| <b>eGFP_Tg_Rev</b>                | GCA GAT GAA CTT CAG GGT CAG                                |
| <b>Cloning</b>                    |                                                            |
| <b>Ddx3y_cDNA_Fwd</b>             | GTC GAC ATG AGT CAA GTG GCA GCG GA                         |
| <b>Ddx3y_cDNA_Rev</b>             | AGA TCT TCA ATT GCC CCA CCA GTC AAC                        |
| <b>px330_CE05_gRNA_F1</b>         | CACC G AAG GTG CAC GTC AGA ACT TC                          |
| <b>px330_CE05_gRNA_R1</b>         | AAAC GAA GTT CTG ACG TGC ACC TT C                          |
| <b>px330_CE08_gRNA_F2</b>         | CACC G CCA TAT GGC AAA TAT CAT CT                          |
| <b>px330_CE08_gRNA_R2</b>         | AAAC AGA TGA TAT TTG CCA TAT GG C                          |
| <b>CRISPR/Cas9 targeting</b>      |                                                            |
| <b>Cas9_Invitro_Fwd</b>           | TAA TAC GAC TCA CTA TAG GGA GAA TGG ACT ATA AGG ACC ACG AC |
| <b>Cas9_Invitro_Rev</b>           | GCG AGC TCT AGG AAT TCT TAC                                |
| <b>sgRNA_CE05_Invitro_Fwd</b>     | TTA ATACGA CTC ACT ATA G AAG GTG CAC GTC AGA ACT TC        |
| <b>sgRNA_CE08_Invitro_Fwd</b>     | TTA ATACGA CTC ACT ATA G CCA TAT GGC AAA TAT CAT CT        |
| <b>sgRNA_px330_Invitro_Rev</b>    | AAA AGC ACC GAC TCG GTG CC                                 |
| <b>Genotyping</b>                 |                                                            |
| <b>CRISPR_Hace-Grik2 SER_Fwd</b>  | CAC TGT AAT CAC TTA ATG TTT GGT AAA CC                     |
| <b>CRISPR_Hace-Grik2 SER_Rev1</b> | CTT CCC AGG AAA TTT TAA TGT AAC TGT TG                     |
| <b>CRISPR_Hace-Grik2 SER_Rev2</b> | GGT ACC GGG GGT AAA CAT TTG ATC AGC ATC                    |
| <b>MycDdx3y_Fwd</b>               | ATC TAA AGG GGT CTG TGA TAA GG                             |
| <b>MycDdx3y_Rev</b>               | GAG AAT GGG TAG TAG AAA TGC AG                             |
| <b>MycSry_Fwd</b>                 | TTT ATG GTG TGG TCC CGT GG                                 |
| <b>MycSry_Rev</b>                 | GAT GTC AGC TGT TAG TAA GTA GG                             |
| <b>Smcxy Forward</b>              | TGA AGC TTT TGG CTT TGA G                                  |
| <b>Smcxy Reverse</b>              | CCA CTG CCA AAT TCT TTG G                                  |
| <b>Zfy Forward</b>                | GAC CAG ATT GTT GTG GAA GTA CAA G                          |
| <b>Zfy Reverse</b>                | CCA GTG TGT CTG AAG TGT CAG CTG                            |
| <b>4C-seq</b>                     |                                                            |
| <b>4C_Pair 1_Fwd</b>              | TAG GCT ACA GGT ATG TTT TTA GC                             |
| <b>4C_Pair 1_Rev</b>              | ATC CCA GGT GTT GCC AAC AG                                 |
| <b>4C_Pair 2_Fwd</b>              | TGA AGG AGT TCT CAG TCA TTA AG                             |
| <b>4C_Pair 2_Rev</b>              | CAA GTG ACT AGA AGG CAG ACC                                |

|               |                                   |
|---------------|-----------------------------------|
| 4C_Pair 3_Fwd | CAT AGC CCT AGT TGT CCT GG        |
| 4C_Pair 3_Rev | GGA GGA ACC TTG ACC TGA TG        |
| 4C_Pair 4_Fwd | AA TTA GGT CTC TCT CCA TGC TG     |
| 4C_Pair 4_Rev | TAT CTA GGG AAT GAG CCC AAA C     |
| 4C_Pair 5_Fwd | CAG ACA CTA GAG TTT TCT GTG C     |
| 4C_Pair 5_Rev | CGC ATT GTA AAA CAC AAT TTA CTG G |

---

### 3C-PCR

|                       |                                                |
|-----------------------|------------------------------------------------|
| Dusp26 locus          | CCA GCA CCA CCC AAT TAT GTT AAA GGC TAC        |
| Hace1-Grik2 SER locus | ACC CAA ATG AAG ACA GAA TGA GAA GTC ACC AGG AG |

---

### ChIP-PCR

|            |                               |
|------------|-------------------------------|
| pDdx3y_Fwd | TAC CTT GGG TTG TGG AAT TGT G |
| pDdx3y_Rev | ACA AAG TGA AAA GGG TTG AGG C |
| pDdx3x_Fwd | TTG AAG CTG AGT CTT GGG GG    |
| pDdx3x_Rev | AAT GTG TGA CTG GAC ACA ACC   |
| pMdm2_Fwd  | AAA CGT CTT TCG GCA ATA GCT C |
| pMdm2_Rev  | GGT CCA GGA GGT GAC AGG T     |
